# Supplementary material
Source: MDPI journal article supplement (https://www.mdpi.com/2077-1312/12/4/613)
Supplement: s1 [file s1]

## Supplementary Materials

### 1. Supplementary Tables S1-S7

### 2. Supplementary Appendices S1-S5

**Supplementary Table S1.** Sampling sectors of hull-fouling macroinvertebrates on the research vessels.

| Hull sectors | Sampling parts of the ship's surface                          |
|--------------|---------------------------------------------------------------|
| Upper        | Just around waterline (ship's central and prow parts)         |
| Middle       | Mid depth (between the waterline and flat bottom)             |
| Bottom       | Flat bottom (ship's bottom including the seawater inlet part) |
| Niche areas  | Propeller and shaft, thruster                                 |

**Supplementary Table S2.** Information on the research vessels such as the navigation area, tonnage, dimension, and sampling date based on KIOST operating guidelines.

| Navigation area | Name of R/Vs | Tonnage (ton) | Length (m) | Speed (kn) | Cleaning date                                | Sampling date                                | Sampling dock       |
|-----------------|--------------|---------------|------------|------------|----------------------------------------------|----------------------------------------------|---------------------|
| Ocean           | ISABU        | 5,894         | 99.8       | 12–15      | 12 <sup>th</sup> –13 <sup>th</sup> Jan. 2017 | 12 <sup>th</sup> –13 <sup>th</sup> Jan. 2018 | ORIENT shipyard     |
|                 | ONNURI       | 1,370         | 63.8       | 12.5       | 28 <sup>th</sup> –29 <sup>th</sup> Mar. 2016 | 28 <sup>th</sup> –29 <sup>th</sup> Mar. 2017 | ORIENT shipyard     |
| Coastal         | EARDO        | 357           | 49.0       | 12.0       | 15 <sup>th</sup> Mar. 2016                   | 15 <sup>th</sup> Mar. 2017                   | SUNJIN shipbuilding |
| Coastal & Local | JANGMOK 2    | 35            | 24.0       | 16.0       | 15 <sup>th</sup> Mar. 2016                   | 15 <sup>th</sup> Mar. 2017                   | SUNJIN shipbuilding |
| Local           | JANGMOK 1    | 41            | 24.2       | 13.0       | 19 <sup>th</sup> Sep. 2016                   | 19 <sup>th</sup> Sep. 2017                   | SUNJIN shipbuilding |

<http://www.kiost.ac.kr>

**Supplementary Table S3.** Operational records of the research vessels for one year from 2016 to 2017 (Abbreviations: Sail, sailing days; Anchor, anchoring days).

| Research vessel | Operating region | Sail/Anchor by region | Month (Sail, Anchor)                                                                                                      |                                                             | Operating route                                                        | Anchorage harbor                                                                                                                 |
|-----------------|------------------|-----------------------|---------------------------------------------------------------------------------------------------------------------------|-------------------------------------------------------------|------------------------------------------------------------------------|----------------------------------------------------------------------------------------------------------------------------------|
| ISABU           | Ocean            | 186/22                | Jan (5, 26)<br>Feb (27, 1)<br>Mar (13, 18)<br>Apr (0, 30)<br>May (13, 18)                                                 | Sep (26, 4)<br>Oct (16, 15)<br>Nov (28, 2)<br>Dec (11, 20)  | Indian Ocean,<br>Northwest Pacific<br>Ocean                            | Guam and Palau port,<br>Colombo, Port Louis                                                                                      |
|                 | South Sea        | 25/124                | Jun (20, 10)<br>Jul (30, 1)<br>Aug (30, 1)                                                                                |                                                             | South coast of<br>Korea                                                | Jangmok, Gwangyang and<br>Busan port                                                                                             |
|                 | East Sea         | 8/0                   |                                                                                                                           |                                                             | Dokdo Is.                                                              | -                                                                                                                                |
|                 | West Sea         | 0/0                   |                                                                                                                           |                                                             | -                                                                      | -                                                                                                                                |
|                 |                  |                       |                                                                                                                           |                                                             |                                                                        |                                                                                                                                  |
| ONNURI          | Ocean            | 101/9                 | Jan (0, 31)<br>Feb (7, 21)<br>Mar (11, 20)<br>Apr (18, 12)<br>May (17, 14)<br>Jun (8, 22)<br>Jul (29, 2)<br>Aug (29, 2)   | Sep (19, 11)<br>Oct (21, 10)<br>Nov (5, 25)<br>Dec (1, 30)  | Indian Ocean,<br>Northwest Pacific<br>Ocean                            | Colombo, Port Louis and<br>Guam port                                                                                             |
|                 | South Sea        | 44/189                |                                                                                                                           |                                                             | South coast of<br>Korea,<br>Korea strait, East<br>China Sea            | Siljeon, Seogwipo, Jeju, Mokpo,<br>Jangmok, Busan and<br>Jangcheon port                                                          |
|                 | East Sea         | 14/1                  |                                                                                                                           |                                                             | Ulleung Is.,<br>Dokdo Is.                                              | Sadong and Pohang port                                                                                                           |
|                 | West Sea         | 6/1                   |                                                                                                                           |                                                             | Yellow sea                                                             | -                                                                                                                                |
|                 |                  |                       |                                                                                                                           |                                                             |                                                                        |                                                                                                                                  |
| EARDO           | South Sea        | 77/151                | Jan (0, 31)<br>Feb (21, 7)<br>Mar (16, 15)<br>Apr (16, 14)<br>May (22, 9)<br>Jun (10, 20)<br>Jul (15, 16)<br>Aug (19, 12) | Sep (27, 3)<br>Oct (11, 20)<br>Nov (13, 17)<br>Dec (10, 21) | South coast of<br>Korea, East<br>China Sea,<br>Heuksan Is. Jeju<br>Is. | Jangmok, Seogwipo,<br>Jangcheon, Busan, Gangjeong,<br>Wando, Jeju, Gamcheon,<br>Jinhae, Gwangyang, Yeosu and<br>Jangseungpo port |
|                 | East Sea         | 91/33                 |                                                                                                                           |                                                             | Ulleung Is.,<br>Dokdo Is.,<br>Yeongil Bay                              | Sadong, Pohang, Mukho,<br>Sokcho, Ulsan and Imwon port                                                                           |
|                 | West Sea         | 12/1                  |                                                                                                                           |                                                             | Yellow Sea                                                             | Gunsan port                                                                                                                      |
|                 |                  |                       |                                                                                                                           |                                                             |                                                                        |                                                                                                                                  |
| JANGMOK 1       | South Sea        | 102/186               | Jan (0, 31)<br>Feb (8, 20)<br>Mar (7, 24)<br>Apr (27, 3)<br>May (15, 16)<br>Jun (26, 4)<br>Jul (15, 16)<br>Aug (17, 14)   | Sep (2, 28)<br>Oct (15, 16)<br>Nov (8, 22)<br>Dec (1, 30)   | South coast of<br>Korea, Korea<br>strait, Jeju Is.                     | Jangmok, Jangseungpo,<br>Wando, Gangjeong, Swimi,<br>Yeosu, Busan, Mokpo,<br>Bigeumdo, Gukdong and<br>Yokjido port               |
|                 | East Sea         | 39/38                 |                                                                                                                           |                                                             | Jumunjin and<br>Ulsan coast                                            | Pohang, Mukho, Ulsan, Onsan,<br>Imwon, Jukbyeon port                                                                             |
|                 | West Sea         | 0/0                   |                                                                                                                           |                                                             | -                                                                      | -                                                                                                                                |
| JANGMOK 2       | South Sea        | 54/78                 | Jan (0, 31)<br>Feb (11, 17)<br>Mar (11, 20)<br>Apr (2, 28)<br>May (4, 27)<br>Jun (29, 1)<br>Jul (5, 26)<br>Aug (3, 28)    | Sep (28, 2)<br>Oct (31, 0)<br>Nov (14, 16)<br>Dec (0, 31)   | South coast of<br>Korea                                                | Busan, Jangseungpo, Wando,<br>Jinhae, Jangmok, Jangseungpo<br>and Tongyeong port                                                 |
|                 | East Sea         | 43/115                |                                                                                                                           |                                                             | East coast of<br>Korea, Ulleung<br>Is., Dokdo Is.                      | Pohang, Sokcho, Jumunjin,<br>Jukbyeon, Hyeongpo and<br>Mukho port                                                                |
|                 | West Sea         | 41/34                 |                                                                                                                           |                                                             | Gocheong Is.,<br>Baengnyeong Is.,<br>Daechong Is.                      | Gocheongdo and<br>Baengnyeongdo port                                                                                             |
|                 |                  |                       |                                                                                                                           |                                                             |                                                                        |                                                                                                                                  |

<http://kumos.kiost.ac.kr>

**Supplementary Table S4.** List of native and NIS found among 47 species of hull-fouling macroinvertebrates in this study. The numbers are the sum of the number of individuals of macroinvertebrate species attached to the hull of each vessel. Asterisks indicate six native and eight NIS. Others are species of unknown origin.

| No.                       | Phylum         | Sub taxa     | Abbre. | Species                             | Isabu | Onnuri | Eardo   | Jangmok 1 | Jangmok 2 | Native | NIS |
|---------------------------|----------------|--------------|--------|-------------------------------------|-------|--------|---------|-----------|-----------|--------|-----|
| 1                         | Bryozoa        | Bugulidae    | Bry    | <i>Bugulina californica</i>         |       |        |         | 1         | 9         |        | ★   |
| 2                         | Bryozoa        | Bugulidae    | Bry    | <i>Bugula neritina</i>              |       |        |         |           | 1         |        | ★   |
| 3                         | Cnidaria       | Actiniaria   | CAC    | <i>Heteranthus</i> sp.              |       |        | 1       |           |           |        |     |
| 4                         | Cnidaria       | Hydrozoa     | CHy    | <i>Sertulariidae</i> unid.          |       |        |         |           | 3         |        |     |
| 5                         | Mollusca       | Gastropoda   | MGa    | <i>Cheilea cepacea</i>              |       |        | 1       |           |           |        |     |
| 6                         | Mollusca       | Bivalvia     | MBi    | <i>Hiatella arctica</i>             |       | 2      | 1       |           |           |        |     |
| 7                         | Mollusca       | Bivalvia     | MBi    | <i>Magallana gigas</i>              |       | 3      | 392     | 49        | 251       | ★      |     |
| 8                         | Mollusca       | Bivalvia     | MBi    | <i>Modiolus kurilensis</i>          |       |        | 1       |           |           |        |     |
| 9                         | Mollusca       | Bivalvia     | MBi    | <i>Musculus senhousia</i>           |       |        | 3       |           |           |        |     |
| 10                        | Mollusca       | Bivalvia     | MBi    | <i>Mytilus galloprovincialis</i>    |       | 8      | 126     |           | 88        |        | ★   |
| 11                        | Annelida       | Polychaeta   | APol   | <i>Eteone longa</i>                 |       |        | 1       |           |           |        |     |
| 12                        | Annelida       | Polychaeta   | APol   | <i>Hydroides ezoensis</i>           |       | 8      | 70      |           | 544       | ★      |     |
| 13                        | Annelida       | Polychaeta   | APol   | <i>Marphysa sanguinea</i>           |       |        |         | 1         |           |        |     |
| 14                        | Annelida       | Polychaeta   | APol   | <i>Nereis multignatha</i>           |       |        | 9       | 15        | 7         |        |     |
| 15                        | Annelida       | Polychaeta   | APol   | <i>Nereis pelagica</i>              |       |        |         |           | 2         |        |     |
| 16                        | Annelida       | Polychaeta   | APol   | <i>Perinereis nuntia</i>            |       |        |         | 1         |           |        | ★   |
| 17                        | Annelida       | Polychaeta   | APol   | <i>Platynereis bicanaliculata</i>   |       |        | 1       |           |           |        |     |
| 18                        | Annelida       | Polychaeta   | APol   | <i>Polydora</i> sp.                 |       |        |         | 1         |           |        |     |
| 19                        | Annelida       | Polychaeta   | APol   | <i>Syllis</i> sp.                   |       |        |         | 4         |           |        |     |
| 20                        | Crustacea      | Amphipoda    | CAM    | <i>Apocorophium acutum</i>          |       |        | 11      |           |           |        |     |
| 21                        | Crustacea      | Amphipoda    | CAM    | <i>Caprella californica</i>         |       |        |         |           | 5         |        | ★   |
| 22                        | Crustacea      | Amphipoda    | CAM    | <i>Caprella equilibra</i>           | 1     |        |         |           |           |        |     |
| 23                        | Crustacea      | Amphipoda    | CAM    | <i>Crassikorophium crassicornae</i> | 1     |        |         |           |           |        |     |
| 24                        | Crustacea      | Amphipoda    | CAM    | <i>Erichthonius pugnax</i>          |       | 1      | 2       | 1         |           |        |     |
| 25                        | Crustacea      | Amphipoda    | CAM    | <i>Jassa slatteryi</i>              |       |        | 99      |           | 38        |        | ★   |
| 26                        | Crustacea      | Amphipoda    | CAM    | <i>Marea</i> sp.                    |       |        |         | 4         |           |        |     |
| 27                        | Crustacea      | Amphipoda    | CAM    | <i>Melita hoshinoi</i>              |       |        |         | 1         |           |        |     |
| 28                        | Crustacea      | Amphipoda    | CAM    | <i>Melita koreana</i>               |       |        |         | 1         |           | ★      |     |
| 29                        | Crustacea      | Amphipoda    | CAM    | <i>Monocorophium acherusicum</i>    | 1     | 1      | 4       | 1         |           |        |     |
| 30                        | Crustacea      | Amphipoda    | CAM    | <i>Pareurystheus anamae</i>         | 1     |        |         |           |           |        |     |
| 31                        | Crustacea      | Amphipoda    | CAM    | <i>Photis reinhardi</i>             |       |        | 1       |           |           |        |     |
| 32                        | Crustacea      | Isopoda      | CIs    | <i>Cirolana koreana</i>             |       |        | 10      | 12        | 1         | ★      |     |
| 33                        | Crustacea      | Isopoda      | CIs    | <i>Dynoides dentisinus</i>          |       |        |         |           | 1         |        |     |
| 34                        | Crustacea      | Isopoda      | CIs    | <i>Paranthura japonica</i>          |       |        |         | 1         |           |        |     |
| 35                        | Crustacea      | Cirripedia   | CCi    | <i>Amphibalanus amphitrite</i>      | 785   | 219    | 2,467   | 3,536     |           |        | ★   |
| 36                        | Crustacea      | Cirripedia   | CCi    | <i>Amphibalanus improvisus</i>      |       | 260    | 7       | 548       |           |        | ★   |
| 37                        | Crustacea      | Cirripedia   | CCi    | <i>Balanus trigonus</i>             |       | 53     | 1,938   | 381       | 1,389     | ★      |     |
| 38                        | Crustacea      | Cirripedia   | CCi    | <i>Conchoderma auritum</i>          | 15    |        |         |           |           |        |     |
| 39                        | Crustacea      | Cirripedia   | CCi    | <i>Fistulobalanus kondakovi</i>     | 6     |        |         |           |           | ★      |     |
| 40                        | Crustacea      | Cirripedia   | CCi    | <i>Lepas anatifera</i>              |       |        |         |           | 1         |        |     |
| 41                        | Crustacea      | Decapoda     | CDe    | <i>Hemigrapsus sinensis</i>         |       |        |         | 1         |           |        |     |
| 42                        | Crustacea      | Decapoda     | CDe    | <i>Philemnus minutus</i>            |       |        | 1       |           |           |        |     |
| 43                        | Crustacea      | Tanaidacea   | CTa    | <i>Zeuxo</i> sp1                    |       |        | 26      |           | 6         |        |     |
| 44                        | Chordata       | Tunicata     | CTu    | <i>Ascidia</i> sp.                  |       |        |         |           | 2         |        |     |
| 45                        | Chordata       | Tunicata     | CTu    | <i>Pyura</i> sp.                    |       |        | 32      |           |           |        |     |
| 46                        | Chordata       | Tunicata     | CTu    | <i>Styela clava</i>                 |       |        | 9       |           | 4         |        |     |
| 47                        | Platyhelminths | Planoceridae | Plat   | <i>Planocera reticulata</i>         |       |        | 2       | 27        |           |        |     |
| No. of species            |                |              |        |                                     | 7     | 9      | 25      | 19        | 18        | 6      | 8   |
| No. of individuals (ind.) |                |              |        |                                     | 817   | 564    | 5,240   | 4,605     | 2,371     |        |     |
| Biomass (gWWt)            |                |              |        |                                     | 70.9  | 9.4    | 1,374.9 | 1,086.5   | 579.8     |        |     |
| No. of samples (15x15 cm) |                |              |        |                                     | 14    | 13     | 16      | 12        | 14        |        |     |

**Supplementary Table S5.** Similarity percentage (SIMPER) results showing the average abundance, the average dissimilarity, the percentage contribution of each species to the dissimilarity among the vessel community groups, the percentage cumulative dissimilarity, and the average dissimilarity of the groups (Group A: Isabu, Group B: Onnuri, Group C: Jangmok 1, Group D: Eardo and Jangmok 2).

| Species                          | Av. Abund. | Av. Abund. | Av. Diss. | Contrib. % | Cum. % | Group Av. Diss. % |
|----------------------------------|------------|------------|-----------|------------|--------|-------------------|
|                                  | Group A    | Group B    |           |            |        |                   |
| <i>Amphibalanus improvisus</i>   | 0.0        | 4.0        | 12.9      | 18.6       | 18.6   | 69.0              |
| <i>Balanus trigonus</i>          | 0.0        | 2.7        | 8.6       | 12.5       | 31.1   |                   |
| <i>Conchoderma auritum</i>       | 2.0        | 0.0        | 6.3       | 9.1        | 40.3   |                   |
|                                  | Group A    | Group C    |           |            |        |                   |
| <i>Amphibalanus improvisus</i>   | 0.0        | 4.8        | 9.4       | 12.5       | 12.5   | 75.5              |
| <i>Balanus trigonus</i>          | 0.0        | 4.4        | 8.6       | 11.4       | 23.9   |                   |
| <i>Magallana gigas</i>           | 0.0        | 2.7        | 5.2       | 6.8        | 30.7   |                   |
| <i>Amphibalanus amphitrite</i>   | 5.3        | 7.7        | 4.7       | 6.2        | 36.9   |                   |
|                                  | Group A    | Group D    |           |            |        |                   |
| <i>Balanus trigonus</i>          | 0.0        | 6.4        | 11.1      | 12.3       | 12.3   | 90.6              |
| <i>Magallana gigas</i>           | 0.0        | 4.2        | 7.3       | 8.1        | 20.3   |                   |
| <i>Hydroides ezoensis</i>        | 0.0        | 3.9        | 7.0       | 7.7        | 28.1   |                   |
| <i>Amphibalanus amphitrite</i>   | 5.3        | 3.5        | 6.6       | 7.3        | 35.4   |                   |
| <i>Mytilus galloprovincialis</i> | 0.0        | 3.2        | 5.6       | 6.2        | 41.6   |                   |
|                                  | Group B    | Group C    |           |            |        |                   |
| <i>Amphibalanus amphitrite</i>   | 3.9        | 7.7        | 6.8       | 13.2       | 13.2   | 51.3              |
| <i>Planocera reticulata</i>      | 0.0        | 2.3        | 4.0       | 7.8        | 21.0   |                   |
| <i>Nereis multignatha</i>        | 0.0        | 2.0        | 3.5       | 6.7        | 27.8   |                   |
| <i>Cirolana koreana</i>          | 0.0        | 1.9        | 3.3       | 6.4        | 34.1   |                   |
| <i>Balanus trigonus</i>          | 2.7        | 4.4        | 3.0       | 5.9        | 40.0   |                   |
|                                  | Group B    | Group D    |           |            |        |                   |
| <i>Balanus trigonus</i>          | 2.7        | 6.4        | 5.8       | 8.9        | 8.9    | 64.8              |
| <i>Amphibalanus amphitrite</i>   | 3.9        | 3.5        | 5.7       | 8.8        | 17.7   |                   |
| <i>Amphibalanus improvisus</i>   | 4.0        | 0.8        | 5.3       | 8.1        | 25.9   |                   |
|                                  | Group C    | Group D    |           |            |        |                   |
| <i>Amphibalanus amphitrite</i>   | 7.7        | 3.5        | 5.5       | 8.9        | 8.9    | 61.6              |
| <i>Amphibalanus improvisus</i>   | 4.8        | 0.8        | 4.9       | 8.0        | 16.9   |                   |
| <i>Hydroides ezoensis</i>        | 0.0        | 3.9        | 4.8       | 7.7        | 24.6   |                   |
| <i>Mytilus galloprovincialis</i> | 0.0        | 3.2        | 3.8       | 6.2        | 30.9   |                   |

**Supplementary Table S6.** One-way ANOSIM pairwise tests for differences between vessel groups for hull-fouling macroinvertebrates (Global R = 0.532,  $p < 0.001$ ).

| Vessel clusters         | R statistic | Significance level (p) | Possible permutations | Actual permutations | Number $\geq$ Observed |
|-------------------------|-------------|------------------------|-----------------------|---------------------|------------------------|
| Isabu vs. Onnuri        | 0.34        | 0.029                  | 35                    | 35                  | 1                      |
| Isabu vs. Eardo         | 0.35        | 0.057                  | 35                    | 35                  | 2                      |
| Isabu vs. Jangmok 1     | 1.00        | 0.029                  | 35                    | 35                  | 1                      |
| Isabu vs. Jangmok 2     | 1.00        | 0.029                  | 35                    | 35                  | 1                      |
| Onnuri vs. Eardo        | 0.08        | 0.229                  | 35                    | 35                  | 8                      |
| Onnuri vs. Jangmok 1    | 0.32        | 0.029                  | 35                    | 35                  | 1                      |
| Onnuri vs. Jangmok 2    | 0.39        | 0.029                  | 35                    | 35                  | 1                      |
| Eardo vs. Jangmok 1     | 0.46        | 0.029                  | 35                    | 35                  | 1                      |
| Eardo vs. Jangmok 2     | 0.64        | 0.029                  | 35                    | 35                  | 1                      |
| Jangmok 1 vs. Jangmok 2 | 1.00        | 0.029                  | 35                    | 35                  | 1                      |

**Supplementary Table S7.** Spearman rank correlation ( $\rho$ ) of the variables of the biological indices and operating conditions of vessels (Abbreviations: TODs, total operation days; TADs, total anchoring days; CODs, coastal operation days; OODs, ocean operation days).

| Variables                                 | No. of species | No. of individuals | Biomass  | H'       | J'       | TOD      | TAD      | COD   |
|-------------------------------------------|----------------|--------------------|----------|----------|----------|----------|----------|-------|
| No. of species                            |                |                    |          |          |          |          |          |       |
| No. of individuals (ind./m <sup>2</sup> ) | 0.760***       |                    |          |          |          |          |          |       |
| Biomass (gWWt./m <sup>2</sup> )           | 0.755***       | 0.755***           |          |          |          |          |          |       |
| H'(loge), Diversity index                 | 0.742***       | NS                 | 0.48*    |          |          |          |          |       |
| J', Evenness index                        | NS             | NS                 | NS       | 0.82***  |          |          |          |       |
| Total operation days (TODs)               | NS             | NS                 | NS       | -0.625** | -0.576** |          |          |       |
| Total anchoring days (TADs)               | NS             | NS                 | NS       | 0.625**  | 0.576**  | -1***    |          |       |
| Coastal operation days (CODs)             | 0.668**        | 0.658**            | 0.686**  | 0.507*   | NS       | -0.671** | 0.671**  |       |
| Ocean operation days (OODs)               | -0.668**       | -0.658**           | -0.686** | -0.507*  | NS       | 0.671**  | -0.671** | -1*** |

Significance level alpha = 0.05 (\* $p < 0.05$ , \*\* $p < 0.01$ , \*\*\* $p < 0.001$ , NS: non-significant)

**Supplementary Appendix S1.** Hull-fouling macroinvertebrate specimens identified to species on the Isabu research vessel.

[illegible]

**Supplementary Appendix S2.** Hull-fouling macroinvertebrate specimens identified to species on the Onnuri research vessel.

[illegible]



**Supplementary Appendix S5.** Hull-fouling macroinvertebrate specimens identified to species on the Jangmok 2 research vessel.

[illegible]
